# Supplementary material
Source: Copernicus journal article supplement (doi:10.5194/esd-17-717-2026)
Supplement: Supplementary file 1 [file esd-17-717-2026-supplement.pdf]

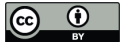

*Supplement of*

## **Comparing the seasonal predictability of the Tropical Pacific variability in EC-Earth3 at two horizontal resolutions**

**Aude Carréric et al.**

*Correspondence to:* Aude Carréric (aude.carreric@bsc.es)

The copyright of individual parts of the supplement might differ from the article licence.

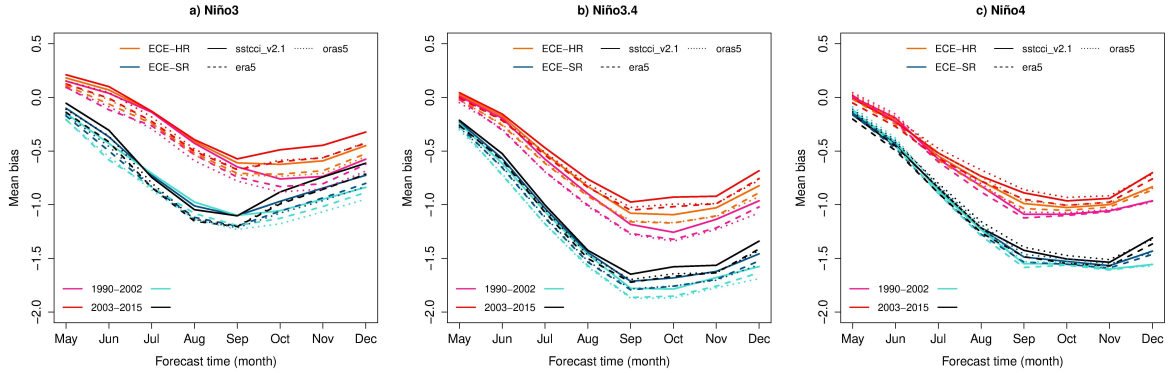

Figure S1: Mean bias of SST in the (a) Niño3 ( $5^{\circ}\text{S}$ - $5^{\circ}\text{N}$ ,  $150^{\circ}\text{W}$ - $90^{\circ}\text{W}$ ), (b) Niño3.4 ( $5^{\circ}\text{S}$ - $5^{\circ}\text{N}$ ,  $170^{\circ}\text{W}$ - $120^{\circ}\text{W}$ ) and (c) Niño4 ( $5^{\circ}\text{S}$ - $5^{\circ}\text{N}$ ,  $160^{\circ}\text{E}$ - $150^{\circ}\text{W}$ ) regions as a function of forecasted month for EC-Earth3-SR and EC-Earth3-HR. Three different periods are shown: the full hindcast period 1990-2015 (orange lines for EC-Earth3-HR and dark blue lines for EC-Earth3-SR), 1990-2003 (pink for EC-Earth3-HR and turquoise for ECEarth3-SR) and 2004-2015 (red for EC-Earth3-HR and black for EC-Earth3-SR). The reference datasets are ESA SST CCI dataset (plain line), ERA5 dataset (dashed line) and ORAS5 dataset (dotted line). The 20 members of each system are used.

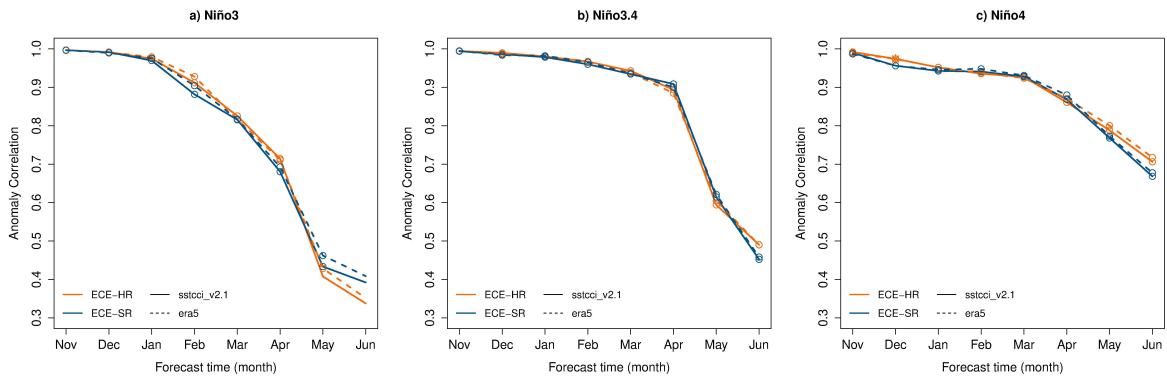

Figure S2: ACC in the (a) Niño3 ( $5^{\circ}\text{S}$ - $5^{\circ}\text{N}$ ,  $150^{\circ}\text{W}$ - $90^{\circ}\text{W}$ ), (b) Niño3.4 ( $5^{\circ}\text{S}$ - $5^{\circ}\text{N}$ ,  $170^{\circ}\text{W}$ - $120^{\circ}\text{W}$ ) and (c) Niño4 ( $5^{\circ}\text{S}$ - $5^{\circ}\text{N}$ ,  $160^{\circ}\text{E}$ - $150^{\circ}\text{W}$ ) regions as a function of forecasted month for (dark blue) EC-Earth3-SR and (orange) EC-Earth3-HR, as in Fig. 2 but for the forecast systems initialised in November. The reference datasets are ESA SST CCI dataset (plain line) and ERA5 dataset (dashed line). The hindcast period is 1993-2014 and the 20 members of each system are used. Open circles mean that the ACC is statistically significant at 95 % level of confidence. The differences of correlations between the SR and HR configurations of EC-Earth are not statistically significant.
